# Supplementary material for: Perioperative fluid management and associated complications in children receiving kidney transplants in the UK
Source: PubMed Central journal article supplement (PMC9925477; doi:10.1007/s00467-022-05690-3), 2022-08-16
Supplement: 467_2022_5690_MOESM1_ESM.pdf [file 467_2022_5690_MOESM1_ESM.pdf]

# Perioperative fluid management and associated complications in children receiving kidney transplants in UK

**HYPOTHESIS:** There is variability in the volumes of fluid administered to children undergoing kidney transplant. This impacts on short term graft function and is associated with fluid-related adverse events

## DESIGN & OUTCOMES:

Retrospective multicentre study

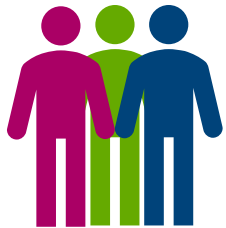

102 children  
5 transplant centres

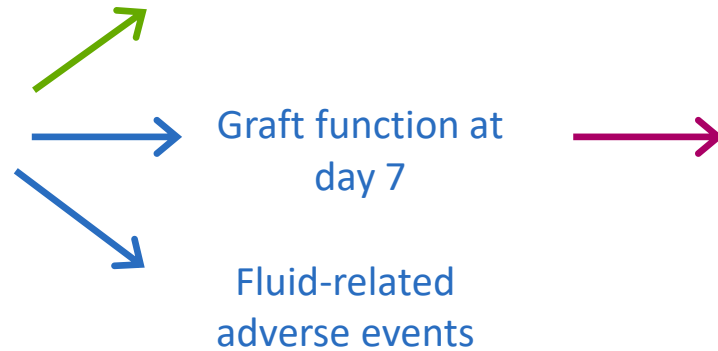

Volume of fluid administered in 1<sup>st</sup> 72hr

Graft function at day 7

Fluid-related adverse events

Highly variable volumes of fluid administered

Negatively skewed, sig. difference between fluid volume & day 7 eGFR

Negatively skewed, sig. difference between urine output & day 7 eGFR

Numerous fluid-related adverse events

Volumes of fluid administered on each day post-operatively

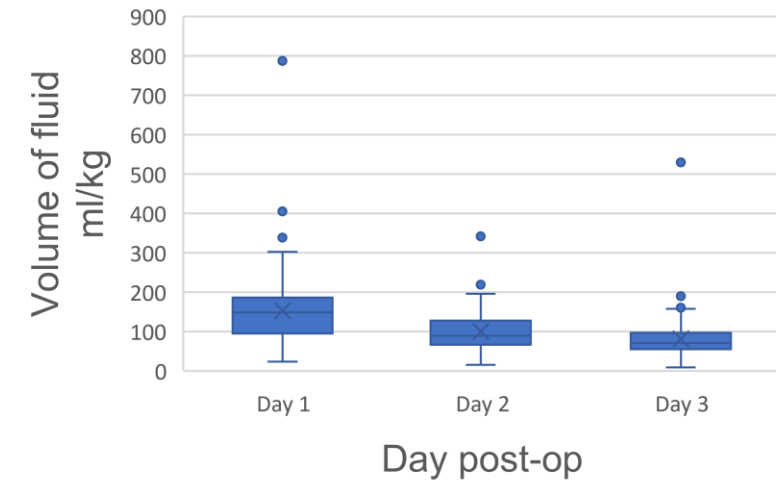

**CONCLUSION:** There is substantial variability in the volume of fluid administered perioperatively to children receiving kidney transplants in the UK. There is a negative association between fluid volume and short term graft function.

Wyatt et al. 2022
